# Supplementary material for: Synthesis, growth, structure and characterization of potassium lithium hydrogen phthalate mixed crystals
Source: Royal Society of Chemistry journal article supplement (doi:10.1039/c5ra05634a), 2015-01-01
Supplement: c5ra05634a1.pdf [file c5ra05634a1.pdf]

### Figure captions

**Fig S1.** FT-IR spectrum of mixed crystal PLHP

**Fig S2.** Thermogram of PLHP

**Fig S3.** EDS spectrum of PLHP

**Fig S4.** Tauc plots (a) Direct Band gap energy curve (b) Indirect Band gap energy curve

**Fig S5.** The comparative SHG oscilloscope traces of the powder samples KHP (red) and PLHP (blue)

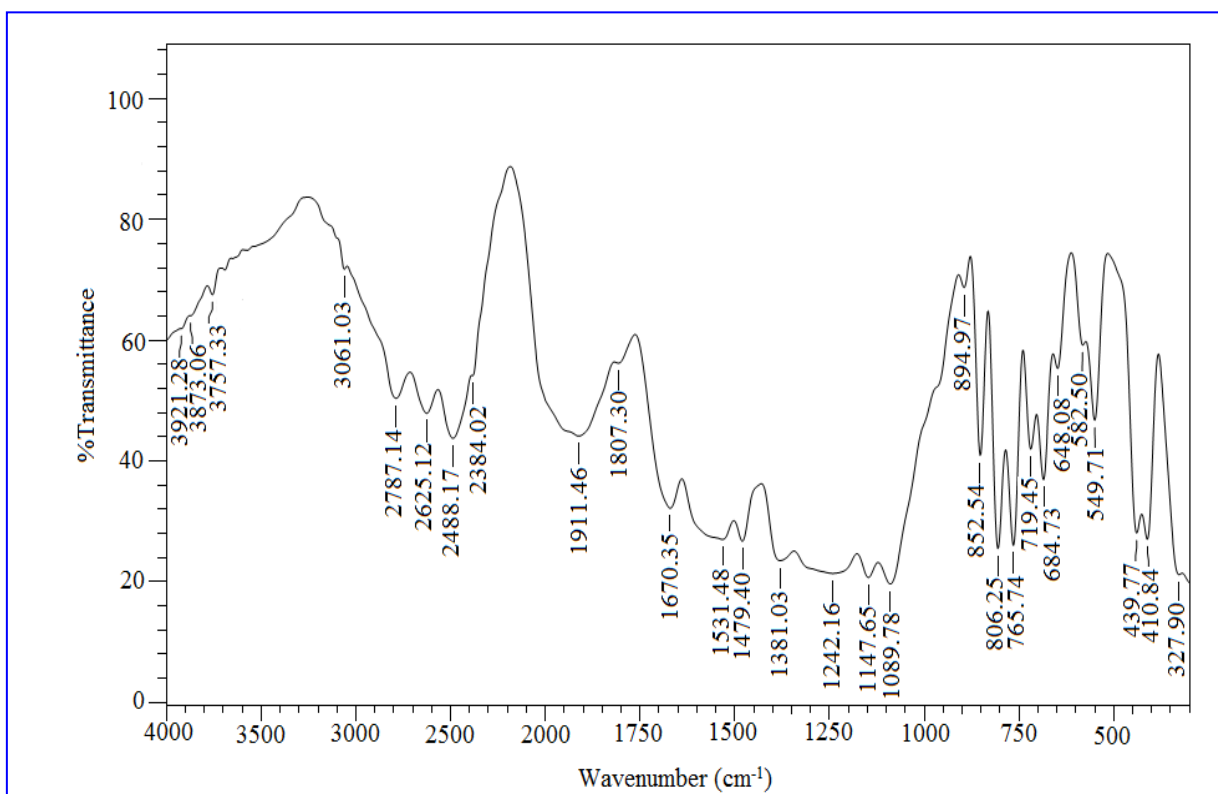

**Fig S1.** FT-IR spectrum of mixed crystal PLHP

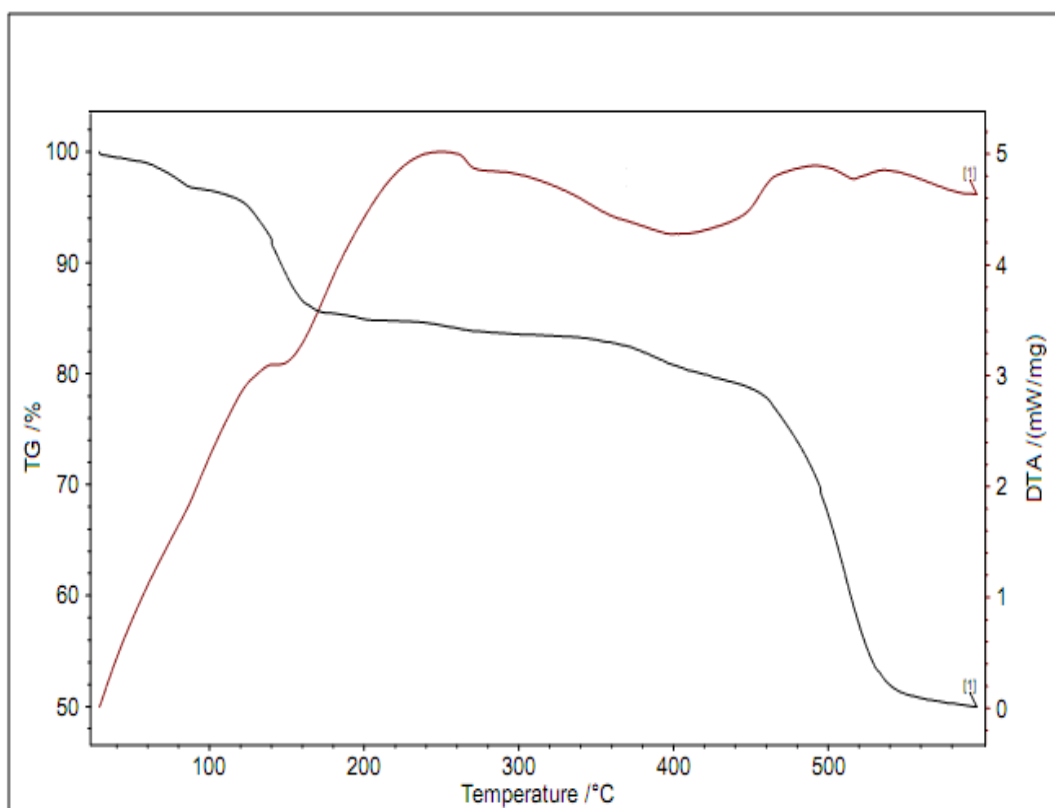

Fig S2. Thermogram of PLHP

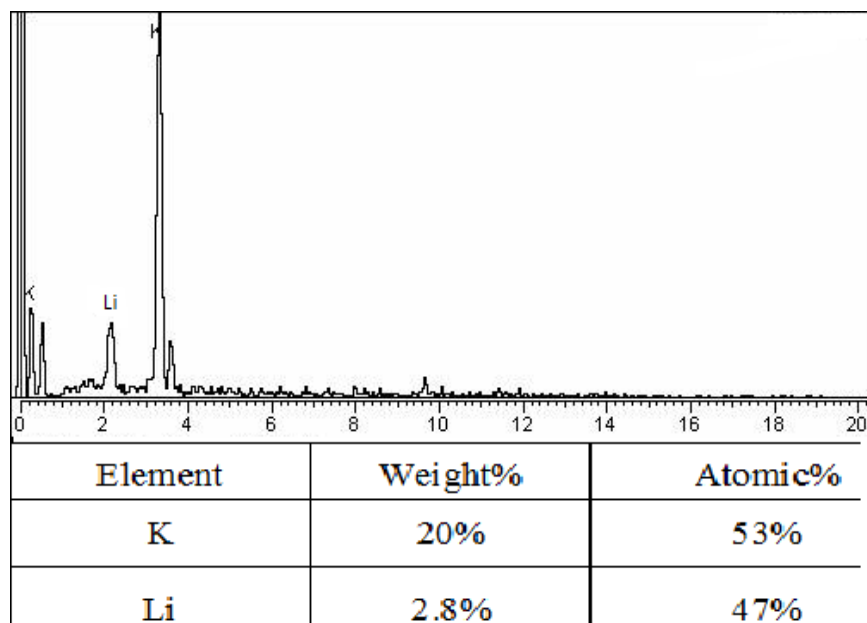

Fig S3. EDS spectrum of PLHP

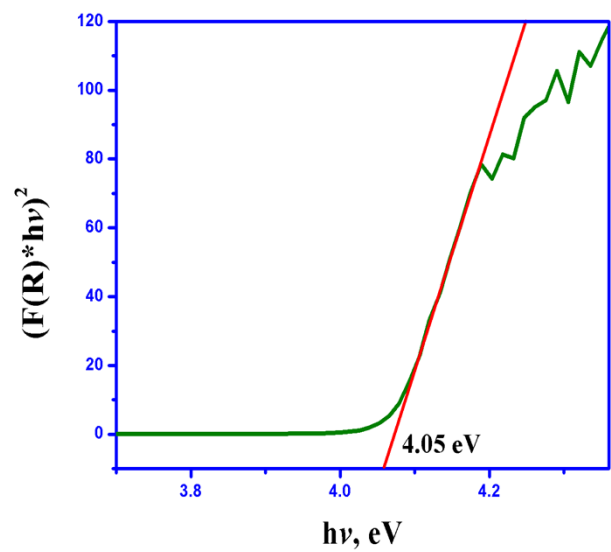

Fig S4. Tauc plot (Direct Band gap energy curve)

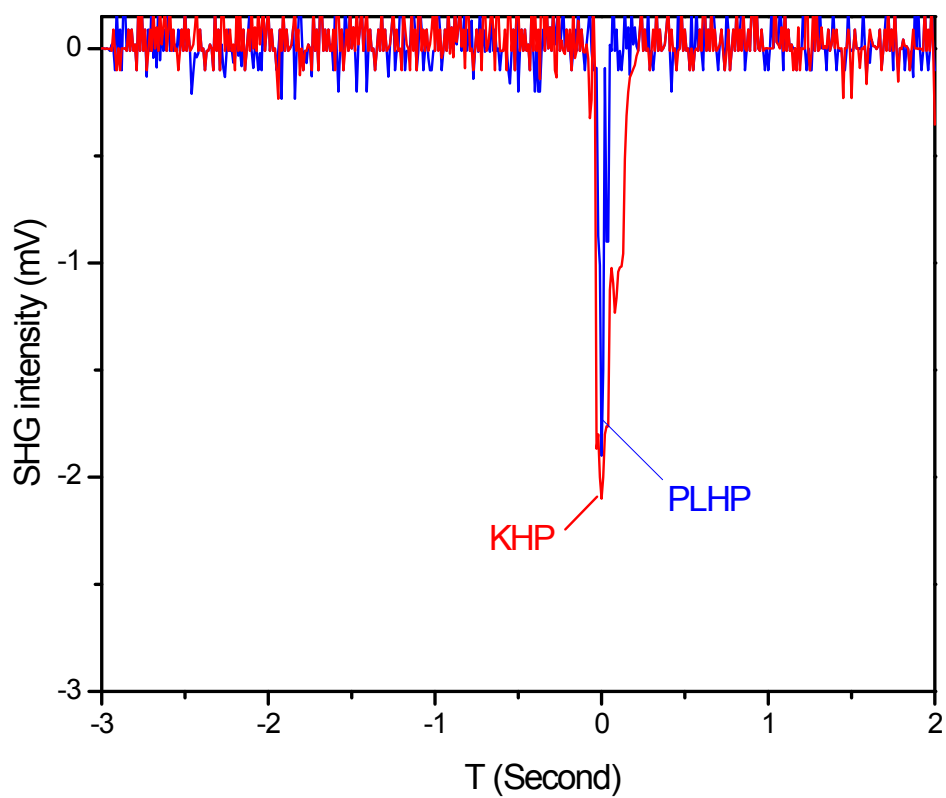

Fig S4. The comparative SHG oscilloscope traces of the powder samples KHP (red) and PLHP (blue)
